# Supplementary material for: Identification of viruses infecting six plum cultivars in Korea by RNA-sequencing
Source: PeerJ journal article supplement (doi:10.7717/peerj.9588), 2020-07-29
Supplement: Figure_S1.pdf [file Figure_S1.pdf]

44 AYA70470.1\_ACLSV  
50 ARQ82805.1\_ACLSV  
CCK73642.1\_ACLSV  
56 ADC80529.1\_ACLSV  
99 ADC80531.1\_ACLSV  
14 ABK62735.1\_ACLSV  
18 AOR84118.1\_ACLSV  
11 ARQ82830.1\_ACLSV  
10 ARQ82819.1\_ACLSV  
AGK64057.1\_ACLSV  
14 AYA70481.1\_ACLSV  
15 ARQ82804.1\_ACLSV  
22 AYA70474.1\_ACLSV  
16 AYA70493.1\_ACLSV  
91 AGK64052.1\_ACLSV  
26 AGK64032.1\_ACLSV  
AGK64033.1\_ACLSV  
72 AEB21294.1\_ACLSV  
73 AEB21300.1\_ACLSV  
8 ARQ82788.1\_ACLSV  
8 BBJ35816.1\_ACLSV  
33 AYA70482.1\_ACLSV  
88 ARQ82787.1\_ACLSV  
9 26 AYA70485.1\_ACLSV  
33 ARQ82812.1\_ACLSV  
CAM35609.1\_ACLSV  
111 AGK64037.1\_ACLSV  
98 CAM35606.1\_ACLSV  
23 AGA16633.1\_ACLSV  
189 AGK64055.1\_ACLSV  
QDK54382.1\_ACLSV  
15 ARQ82817.1\_ACLSV  
240 AKJ26150.1\_ACLSV  
96 CAM35614.1\_ACLSV  
26 CAM35612.1\_ACLSV  
77 APD79267.1\_ACLSV  
40 APD79268.1\_ACLSV  
27 BAF64468.1\_ACLSV  
8 ARQ82807.1\_ACLSV  
AGK64025.1\_ACLSV  
30 AGK64022.1\_ACLSV  
15 AGK64027.1\_ACLSV  
AGK64031.1\_ACLSV  
ARQ82825.1\_ACLSV  
92 ABL63752.1\_ACLSV  
23 AOX36266.1\_ACLSV  
48 ARK38720.1\_ACLSV  
AGK64026.1\_ACLSV  
15 AGK64041.1\_ACLSV  
9 CBJ55282.1\_ACLSV  
97 AYA70477.1\_ACLSV  
631 ARQ82813.1\_ACLSV  
14 ARQ82816.1\_ACLSV  
111 CAM35613.1\_ACLSV  
AGK64038.1\_ACLSV  
52 CDM98674.1\_ACLSV  
83 AGK64045.1\_ACLSV  
38 QDK54385.1\_ACLSV  
QBB78482.1\_ACLSV  
ADC80523.1\_ACLSV  
92 AEZ03864.1\_ACLSV  
53 ASJ27551.1\_ACLSV  
AEZ03865.1\_ACLSV  
ADC80522.1\_ACLSV  
AEZ03863.1\_ACLSV  
71 AEZ03856.1\_ACLSV  
46 ADC80525.1\_ACLSV  
13 AEZ03849.1\_ACLSV  
93 AEZ03881.1\_ACLSV  
4 AEZ03884.1\_ACLSV  
ADC80534.1\_ACLSV  
ADC80519.1\_ACLSV  
33 ADC80537.1\_ACLSV  
ADC80538.1\_ACLSV  
19 AEZ03857.1\_ACLSV  
26 ADC80515.1\_ACLSV  
55 ADC80517.1\_ACLSV  
34 99 ADC80524.1\_ACLSV  
ADC80520.1\_ACLSV  
9 ASJ27542.1\_ACLSV  
50 ASJ27539.1\_ACLSV  
40 AEZ03886.1\_ACLSV  
ADC80516.1\_ACLSV  
AEY80038.1\_ACLSV  
20 AEZ03879.1\_ACLSV  
41 AEZ03874.1\_ACLSV  
46 AEZ03888.1\_ACLSV  
29 AAU93348.1\_ACLSV  
100 ACM51445.1\_ACLSV  
APD79269.1\_ACLSV  
35 ADC80532.1\_ACLSV  
77 ADC80521.1\_ACLSV  
15 AAF67188.1\_ACLSV  
14 ADC80527.1\_ACLSV  
19 ADC80526.1\_ACLSV  
3 ADC80518.1\_ACLSV  
AEZ03887.1\_ACLSV  
AEZ03869.1\_ACLSV  
13 AEZ03868.1\_ACLSV  
81 AEZ03866.1\_ACLSV  
75

ACLSV\_FM

NP\_062430.1\_CMLV
