# Supplementary material for: Identification of viruses infecting six plum cultivars in Korea by RNA-sequencing
Source: PeerJ journal article supplement (doi:10.7717/peerj.9588), 2020-07-29
Supplement: Figure_S2.pdf [file Figure_S2.pdf]

ABU49896.1\_PNRSV  
CAL64258.1\_PNRSV  
CAL64259.1\_PNRSV  
AAC16503.1\_PNRSV  
ABJ16436.1\_PNRSV  
ABU49889.1\_PNRSV  
AEK20752.1\_PNRSV  
AWC67948.1\_PNRSV  
AWC67968.1\_PNRSV  
AWC67974.1\_PNRSV  
ABU49909.1\_PNRSV  
NP\_733826.1\_PNRSV  
ACM79795.1\_PNRSV  
AAY21818.1\_PNRSV  
AFD32234.1\_PNRSV  
ACO52360.1\_PNRSV  
ABY74331.1\_PNRSV  
AAF89725.1\_PNRSV  
AAF89729.1\_PNRSV  
AAF89723.1\_PNRSV  
ABJ16437.1\_PNRSV  
ABJ16438.1\_PNRSV  
AAG59839.2\_PNRSV  
ABJ16434.1\_PNRSV  
AAF89731.1\_PNRSV  
AAF89731.1\_PNRSV  
AAK69834.1\_PNRSV  
AWC67955.1\_PNRSV  
AAC16499.1\_PNRSV  
AWC67962.1\_PNRSV  
CAB37304.1\_PNRSV  
AGV53003.1\_PNRSV  
ASJ26567.1\_PNRSV  
ABU49908.1\_PNRSV  
AGX85387.1\_PNRSV  
AWC67960.1\_PNRSV  
AWC67964.1\_PNRSV  
AAG59840.1\_PNRSV  
AAK69832.1\_PNRSV  
CAB37301.1\_PNRSV  
CAB37302.1\_PNRSV  
ACO52355.1\_PNRSV  
AGX85389.1\_PNRSV  
PNRSV\_HW  
AFD32200.1\_PNRSV  
ABU49888.1\_PNRSV  
ACM79793.1\_PNRSV  
AEK20751.1\_PNRSV  
AAG59841.1\_PNRSV  
ACO52361.1\_PNRSV  
CAB37306.1\_PNRSV  
AFD32230.1\_PNRSV  
AAG59835.1\_PNRSV  
AEK20749.1\_PNRSV  
AWC67967.1\_PNRSV  
CBY89221.2\_PNRSV  
ABY74333.1\_PNRSV  
ABU49907.1\_PNRSV  
AOS50881.1\_PNRSV  
AOS50882.1\_PNRSV  
AAF89721.1\_PNRSV  
APF30472.1\_PNRSV  
AVK77619.1\_PNRSV  
AVK77620.1\_PNRSV  
AVK77616.1\_PNRSV  
AVK77622.1\_PNRSV  
AVK77615.1\_PNRSV  
APF30471.1\_PNRSV  
APF30468.1\_PNRSV  
CAB37311.1\_PNRSV  
ABU49901.1\_PNRSV  
AAC16501.1\_PNRSV  
CAB37314.1\_PNRSV  
AGV53000.1\_PNRSV  
AGV52994.1\_PNRSV  
AGV52993.1\_PNRSV  
AWC67951.1\_PNRSV  
AWC67965.1\_PNRSV  
AAF89711.1\_PNRSV  
AAF89713.1\_PNRSV  
ABU49899.1\_PNRSV  
AAB34202.1\_PNRSV  
AAK69833.1\_PNRSV  
AAF89709.1\_PNRSV  
AGV53002.1\_PNRSV  
AGX85386.1\_PNRSV  
ABC02399.1\_PNRSV  
AFD32216.1\_PNRSV  
ABU49898.1\_PNRSV  
AEL88501.1\_PNRSV  
AWC67946.1\_PNRSV  
AWC67956.1\_PNRSV  
ABY74334.1\_PNRSV  
AFD32232.1\_PNRSV  
AFD32218.1\_PNRSV  
AIA24585.1\_PNRSV  
AAF89715.1\_PNRSV  
AAF89717.1\_PNRSV  
ASJ26584.1\_PNRSV  
AWC67944.1\_PNRSV  
ATB18138.1\_PNRSV  
NP\_604485.1\_ApMV
