# Supplementary material for: Identification of viruses infecting six plum cultivars in Korea by RNA-sequencing
Source: PeerJ journal article supplement (doi:10.7717/peerj.9588), 2020-07-29

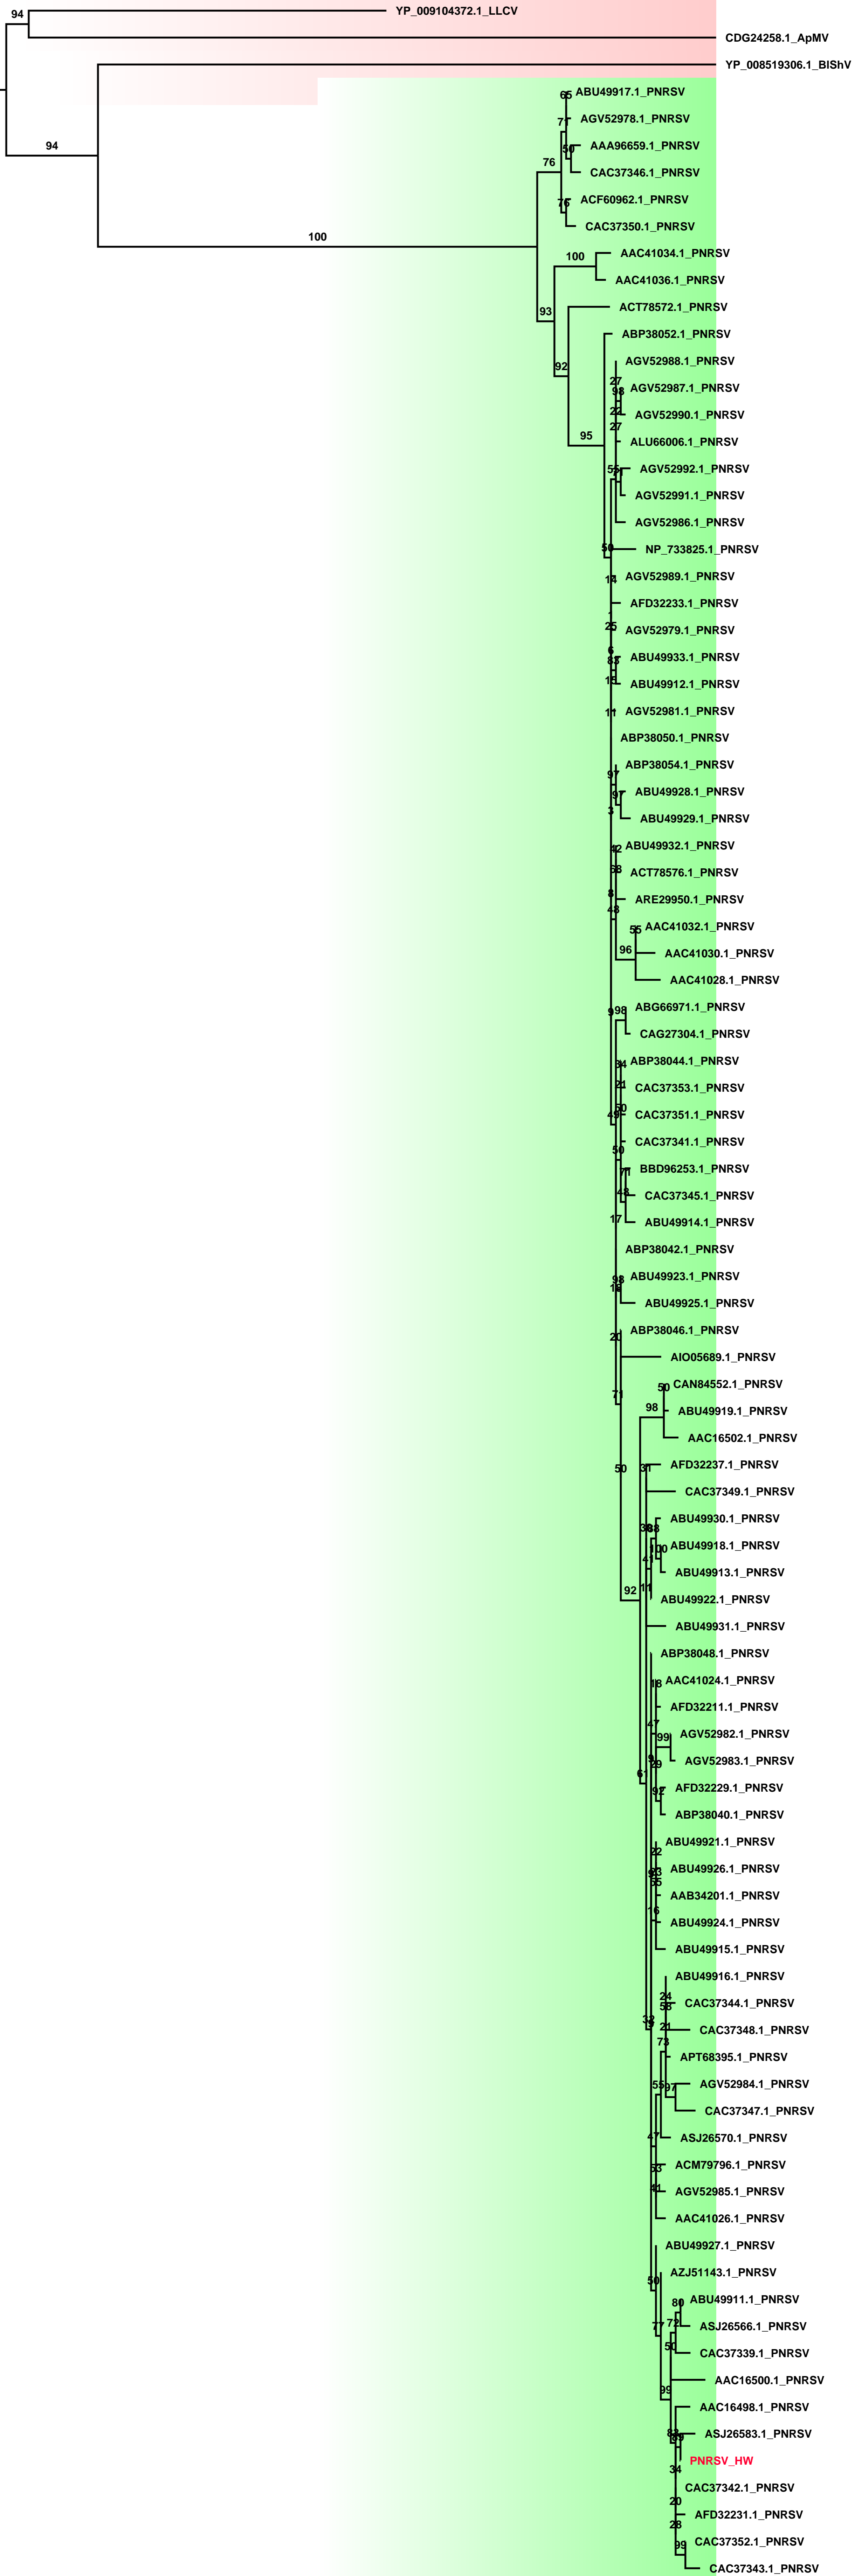

Supplement: Figure_S3.pdf [file Figure_S3.pdf]
