# Supplementary material for: Identification of viruses infecting six plum cultivars in Korea by RNA-sequencing
Source: PeerJ. 2020 Jul 29;8:e9588. doi: 10.7717/peerj.9588 (PMC7395596; doi:10.7717/peerj.9588)
Supplement: Supplemental Information 1 — The accession number of individual RNA-seq and the number of total reads and clean reads (trimmed reads). Clean reads were analyzed by PRINSEQ program. [file peerj-08-9588-s001.xlsx]

## Sheet: Table S1
Table S1. Information of RNA-seq data used for identification of viruses infecting plum trees.
The accession number of individual RNA-seq and the number of total reads and clean reads (trimmed reads) are provided.
Clean reads were analyzed by PRINSEQ program.
SRA number	Cultivar name	Abbreviation	# of Spots	fastq file	total reads	Total number of reads	Clean reads	Proportion of clean reads
SRR2290958	Akihime	AH	17719043	SRR2290958_1	17719043	17719043	10966860	0.6189
				SRR2290958_2	17719043	17719043	10095463	0.5698
SRR5075778	Gadam	PG	17957766	SRR5075778_1	17957766	17957766	11083034	0.6172
				SRR5075778_2	17957766	17957766	10189363	0.5674
SRR5075779	Yeonsik	PY	16032719	SRR5075779_1	16032719	16032719	10075348	0.6284
				SRR5075779_2	16032719	16032719	9289087	0.5794
SRR5074769	European plum	EP	27054471	SRR5074769_1	27054471	27054471	13505030	0.4992
				SRR5074769_2	27054471	27054471	14049854	0.5193
SRR5075777	Hollywood	HW	17854480	SRR5075777_1	17854480	17854480	11890485	0.666
				SRR5075777_2	17854480	17854480	11051026	0.6189
SRR2290955	Formosa	FM	17014839	SRR2290955_1	17014839	17014839	10612613	0.6237
				SRR2290955_2	17014839	17014839	9750114	0.573
