# Supplementary material for: Identification of viruses infecting six plum cultivars in Korea by RNA-sequencing
Source: PeerJ. 2020 Jul 29;8:e9588. doi: 10.7717/peerj.9588 (PMC7395596; doi:10.7717/peerj.9588)
Supplement: Supplemental Information 2 — Virus-associated contigs were assembled by Trinity (v.2.8.6) assembler and viral reads were mapped on the reference genome using BBMap to calculate mapped bases, coverage, number of reads, and RPKM. The names of plum samples were abbreviated as follows: Akihime (Prunus salicina) (AH), Gadam (Prunus salicina) (PG), Yeonsik (Prunus salicina) (PY), Hollywood (Prunus cerasifera) (HW), an unknown European plum (Prunus domestica) (EP), and Formosa (Prunus salicina) (FM). [file peerj-08-9588-s002.xlsx]

## Sheet: Table S2
Table S2. Summary of virus-associated contigs and reads in each plum sample.
Virus-associated contigs were assembled by Trinity (v.2.8.6) assembler and viral reads were mapped on the reference genome using BBMap to calculate mapped bases, coverage, number of reads, and RPKM.
Names of plum samples were abbreviated as follows, Akihime (Prunus salicina) (AH), Gadam (Prunus salicina) (PG), and Yeonsik (Prunus salicina) (PY), Hollywood (Prunus cerasifera) (HW), an unknown European plum (Prunus domestica) (EP), and Formosa (Prunus salicina) (FM).
Cultivar	Library Name	Reference	Genome size	Name of virus	Abbreviation	No. of contigs	Min length	Max length	Bases	Coverage	Reads	RPKM
Akihime	AH	NC_001351.1	302	Hop stunt viroid	HSVd	1		617	16218	53.702	160	857284
		NC_001409.1	7555	Apple chlorotic leaf spot virus	ACLSV	4	201	699	12625	1.6711	124	26558.2
		NC_004362.1	3332	Prunus necrotic ringspot virus RNA1	PNRSV RNA1	1		412	3026	0.9082	30	14568.9
		NC_004363.1	2591	Prunus necrotic ringspot virus RNA2	PNRSV RNA2				2222	0.8576	22	13739.4
		NC_004364.1	1957	Prunus necrotic ringspot virus RNA3	PNRSV RNA3	4	325	561	6137	3.1359	60	49610.3
		MK460243.1	6203	Peach leaf pitting-associated virus RNA1	PLPaV RNA1	5	271	540	8720	1.4058	86	22434.1
		MK460244.1	3838	Peach leaf pitting-associated virus RNA2	PLPaV RNA2	5	265	625	8978	2.3392	89	37522.9
		NC_033828.1	6612	Peach virus D	PeVD				4747	0.7179	47	11502.1
Gadam	PG	MK460243.1	6203	Peach leaf pitting-associated virus RNA1	PLPaV RNA1	4	217	270	6617	1.0667	66	2211.14
		MK460244.1	3838	Peach leaf pitting-associated virus RNA2	PLPaV RNA2	7	250	492	9588	2.4982	95	5143.91
		NC_001351.1	302	Hop stunt viroid	HSVd				627	2.0762	6	4128.75
		NC_001409.1	7555	Apple chlorotic leaf spot virus	ACLSV				1313	0.1738	13	357.588
		NC_004362.1	3332	Prunus necrotic ringspot virus RNA1	PNRSV RNA1				202	0.0606	2	124.738
		NC_004364.1	1957	Prunus necrotic ringspot virus RNA3	PNRSV RNA3				202	0.1032	2	212.38
		NC_009992.1	14214	Plum bark necrosis and stem pitting-associated virus	PBNSPaV				404	0.0284	4	58.4814
		NC_033828.1	6612	Peach virus D	PeVD				2827	0.4276	28	880.034
Yeonsik	PY	NC_033828.1	6612	Peach virus D	PeVD	2	208	226	3838	0.5805	38	24772.1
		MK460243.1	6203	Peach leaf pitting-associated virus RNA1	PLPaV RNA1	2	221	227	5284	0.8518	52	36133.8
		MK460244.1	3838	Peach leaf pitting-associated virus RNA2	PLPaV RNA2	5	216	471	7846	2.0443	78	87599.5
		NC_001351.1	302	Hop stunt viroid	HSVd				104	0.3444	1	14272.7
		NC_009992.1	14214	Plum bark necrosis and stem pitting-associated virus	PBNSPaV				202	0.0142	2	606.493
		NC_001409.1	7555	Apple chlorotic leaf spot virus	ACLSV				6157	0.815	61	34802.3
Hollywood	HW	NC_001409.1	7555	Apple chlorotic leaf spot virus	ACLSV	2	270	307	4228	0.5596	42	9519.23
		NC_004362.1	3332	Prunus necrotic ringspot virus RNA1	PNRSV RNA1	5	222	862	11313	3.3953	112	57557.3
		NC_004363.1	2591	Prunus necrotic ringspot virus RNA2	PNRSV RNA2	4	309	486	6970	2.6901	69	45600.4
		NC_004364.1	1957	Prunus necrotic ringspot virus RNA3	PNRSV RNA3	1		1857	21340	10.9044	211	184620
		MK460243.1	6203	Peach leaf pitting-associated virus RNA1	PLPaV RNA1	1		277	4747	0.7653	47	12974.3
		MK460244.1	3838	Peach leaf pitting-associated virus RNA2	PLPaV RNA2	4	228	873	7373	1.9211	73	32569
		NC_033828.1	6612	Peach virus D	PeVD				2626	0.3972	26	6733.3
European plum	EP	NC_009992.1	4214	Plum bark necrosis and stem pitting-associated virus	PBNSPaV	27	216	1269	85669	6.0271	840	62602.4
		MG934545.1	16927	Little cherry virus 1	LChV-1	4	207	653	10054	0.594	99	6195.6
		NC_001351.1	302	Hop stunt viroid	HSVd				414	1.3709	4	14030.8
Formosa	FM	NC_001351.1	302	Hop stunt viroid	HSVd	1		617	15070	49.9007	150	316362
		NC_001409.1	7555	Apple chlorotic leaf spot virus	ACLSV	4	231	7034	119945	15.8762	1188	100157
		MK460243.1	6203	Peach leaf pitting-associated virus RNA1	PLPaV RNA1	4	210	323	6854	1.1049	68	6982.44
		MK460244.1	3838	Peach leaf pitting-associated virus RNA2	PLPaV RNA2	6	238	544	9586	2.4977	95	15765.9
		NC_033828.1	6612	Peach virus D	PeVD				4646	0.7027	46	4431.24
		NC_009992.1	14214	Plum bark necrosis and stem pitting-associated virus	PBNSPaV				1304	0.0917	13	582.542
		MG934545.1	16927	Little cherry virus 1	LChV-1				707	0.0418	7	263.402
